# Supplementary material
Source: MDPI journal article supplement (https://www.mdpi.com/2076-3417/11/19/9223)
Supplement: s1 [file s1]

## Effect of Pyrolysis Temperature on Copper Aqueous Removal Capability of Biochar Derived from the Kelp *Macrocystis pyrifera*

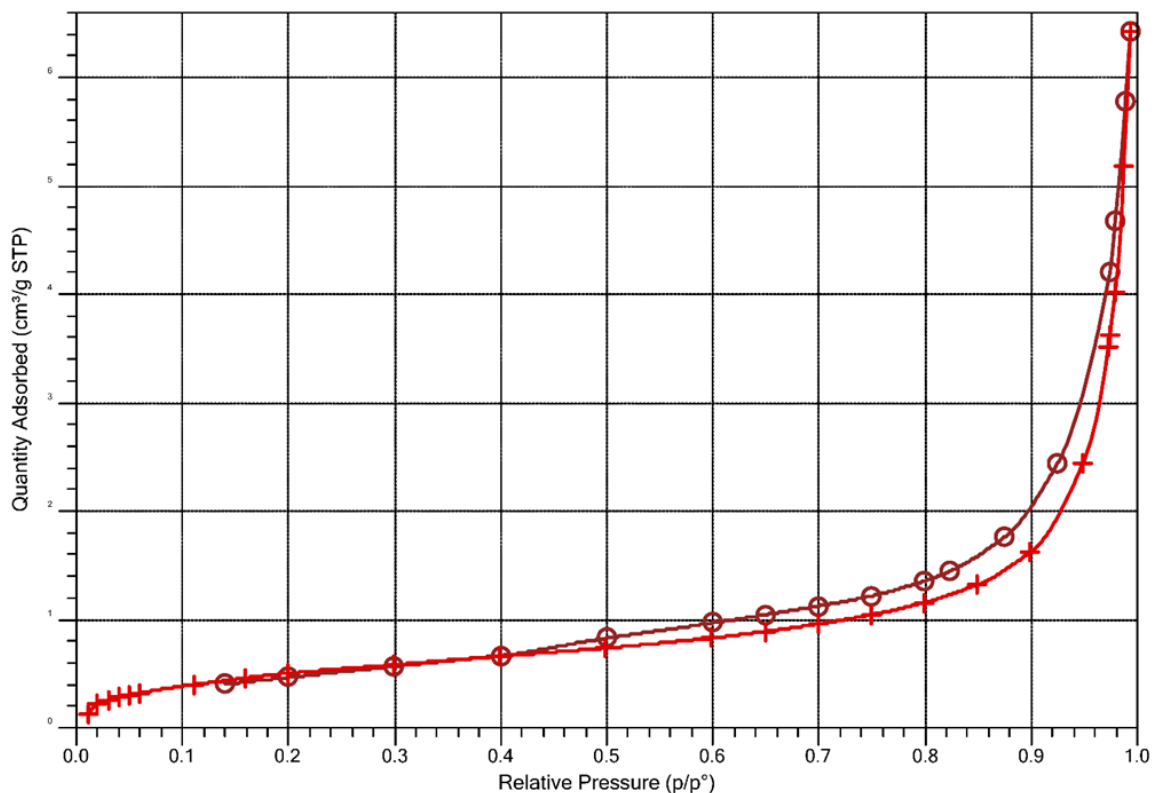

**Figure S1.** Linear isotherm of N<sub>2</sub> adsorption-desorption of BC300. The line with cross represents the adsorption and with circle the desorption curve of N<sub>2</sub>.

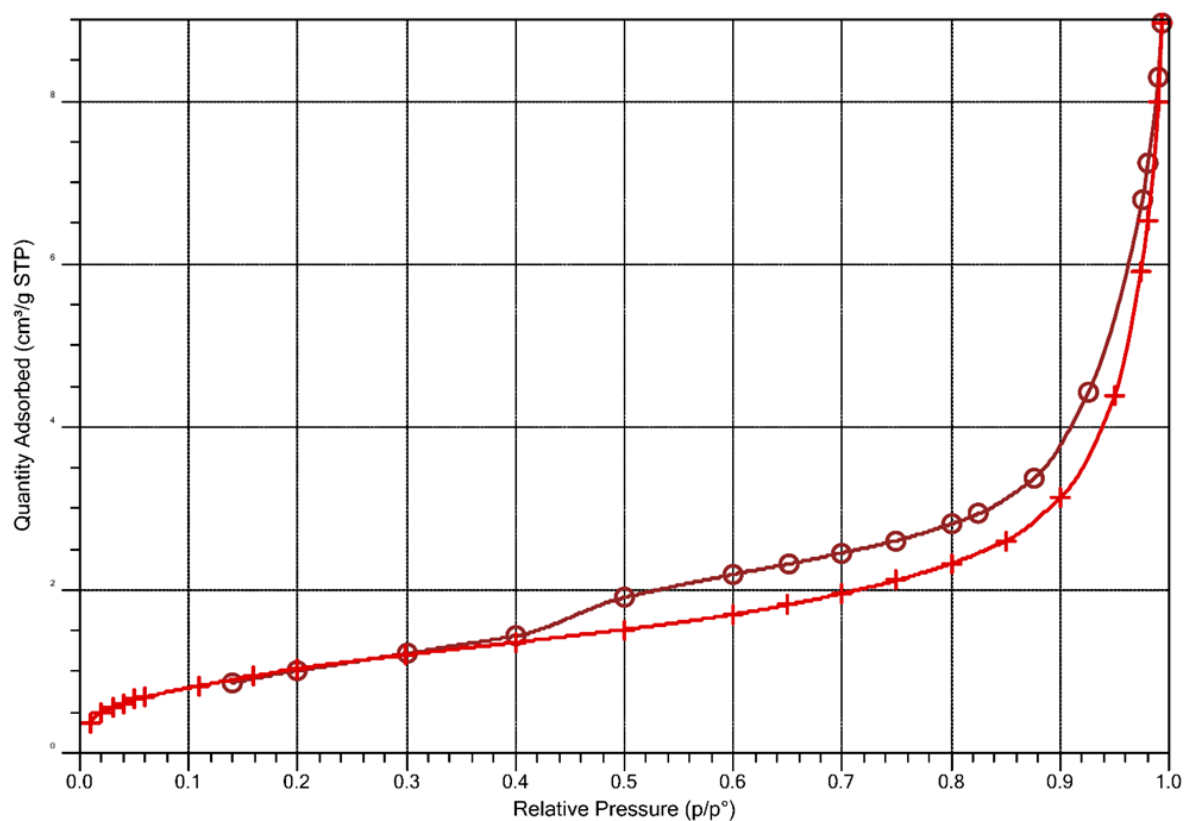

**Figure S2.** Linear isotherm of N<sub>2</sub> adsorption-desorption of BC450. The line with cross represents the adsorption and with circle the desorption curve of N<sub>2</sub>.

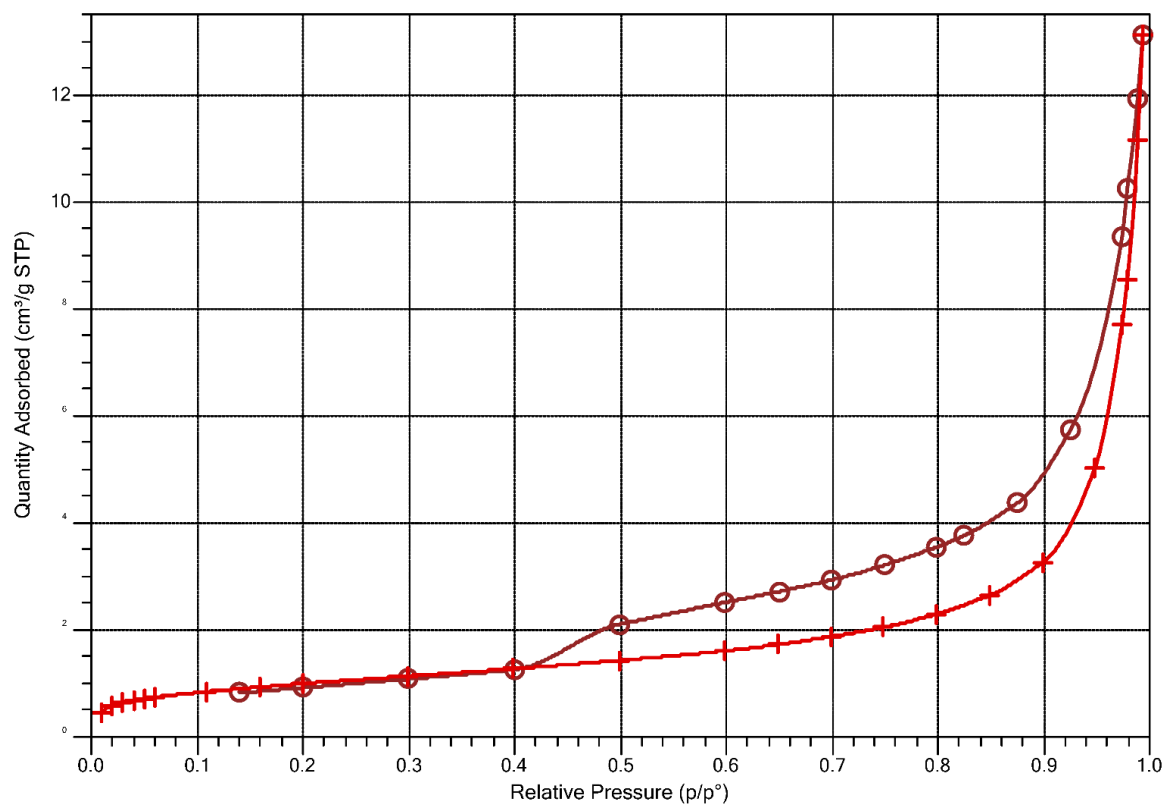

**Figure S3.** Linear isotherm of N<sub>2</sub> adsorption-desorption of BC600. The line with cross represents the adsorption and with circle the desorption curve of N<sub>2</sub>.

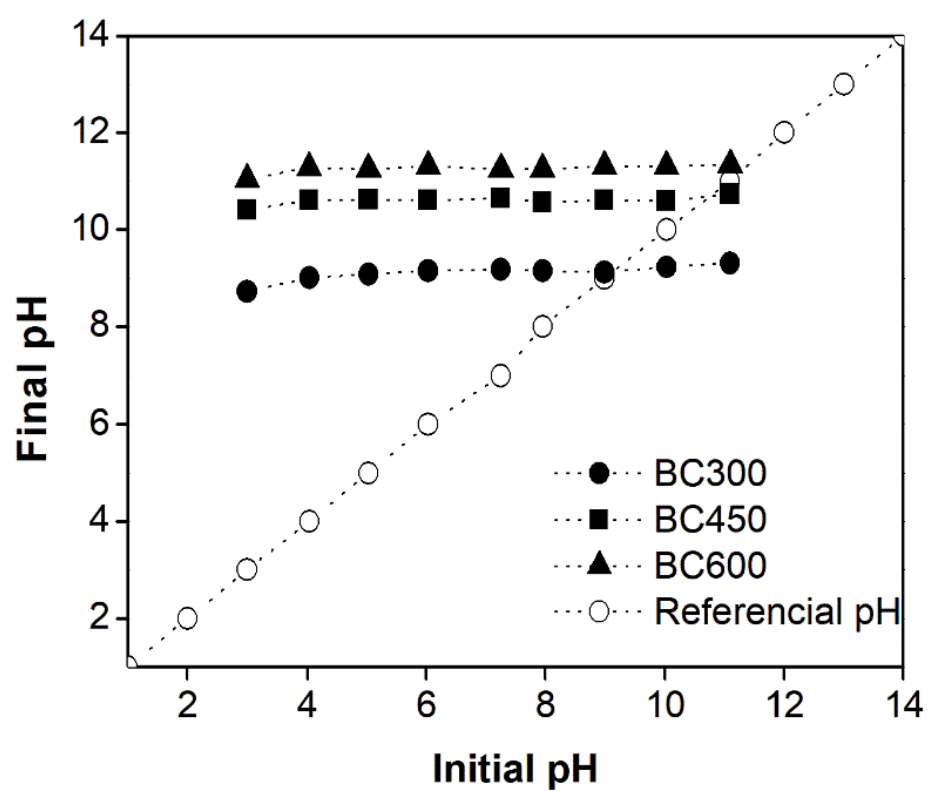

Figure S4.  $pH_{pzc}$  obtain of BCs by drift method.
